# Supplementary material for: Delineating Human B Cell Precursor Development With Genetically Identified PID Cases as a Model
Source: PubMed Central journal article supplement (PMC6901940; doi:10.3389/fimmu.2019.02680), 2019-11-26

Supplemental Material: Extended gating strategy of BMP

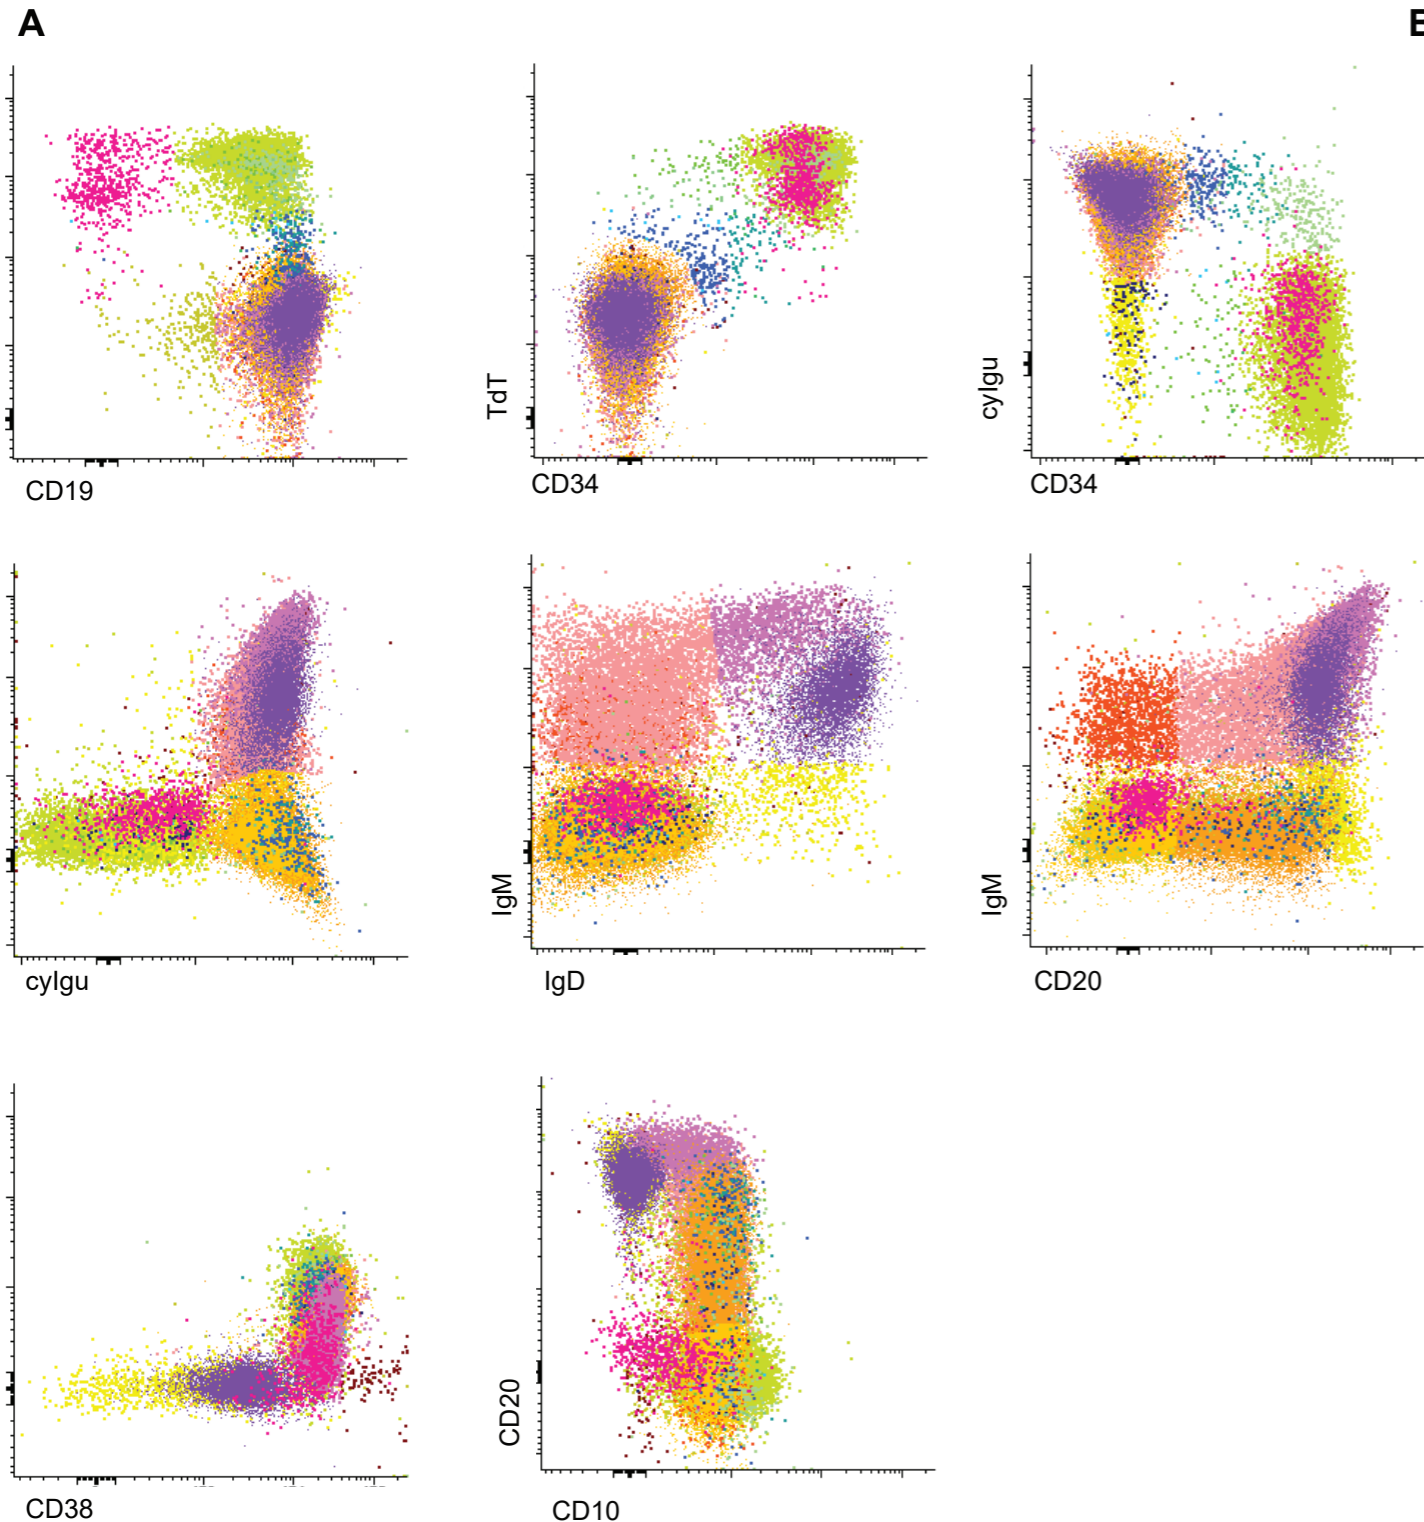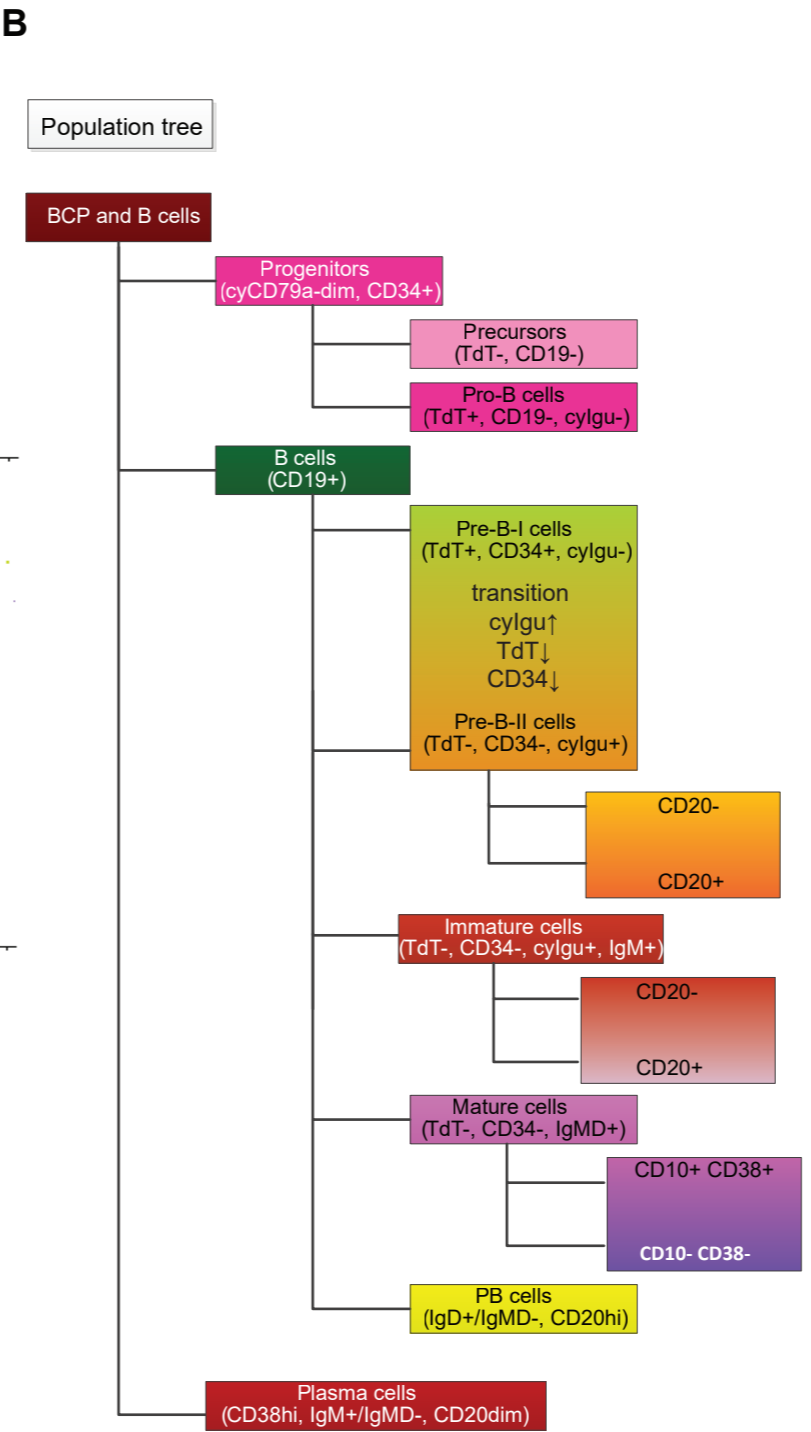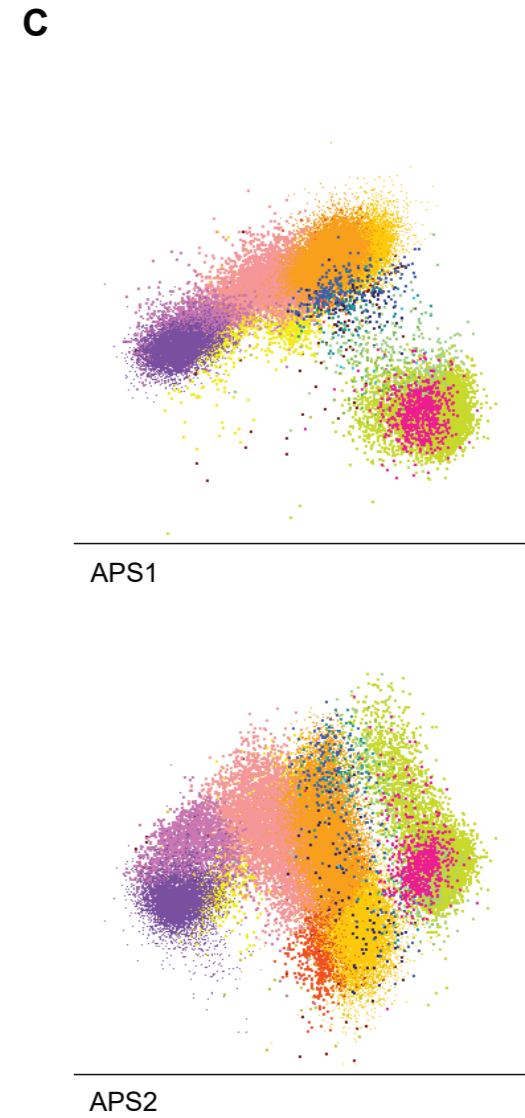

Supplement: Image_1.pdf [file Image_1.pdf]
